# Supplementary material for: Syntheses, structures and anti-tumor activity of four new organotin(iv) carboxylates based on 2-thienylselenoacetic acid
Source: Royal Society of Chemistry journal article supplement (doi:10.1039/c6dt00532b), 2016-01-01
Supplement: c6dt00532b1.pdf [file c6dt00532b1.pdf]

**Syntheses, structures and antitumor activity of four new  
organotin(IV) carboxylates based on 2-thienylselenoacetic acid**

Yuan-Yuan Zhang<sup>a</sup>, Ru-Fen Zhang<sup>a</sup>, Shao-Liang Zhang<sup>a</sup>, Shuang Cheng<sup>b</sup>, Qian-Li Li<sup>a</sup>,

Chun-Lin Ma<sup>\*a</sup>

<sup>a</sup>School of Chemistry and Chemical Engineering, Liaocheng University, Liaocheng,  
252059, China. Email: [macl856@163.com](mailto:macl856@163.com), [macl@lcu.edu.cn](mailto:macl@lcu.edu.cn)

<sup>b</sup>School of Agriculture, Liaocheng University, Liaocheng, 252059, China.

Supporting Information



## 1. Experimental section

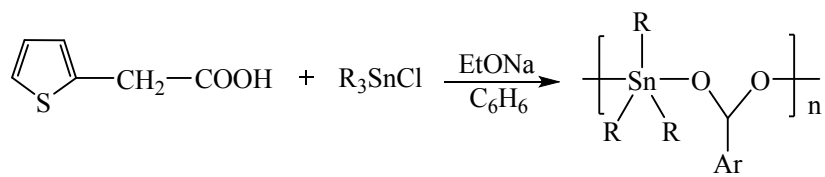

R=Me, **S<sub>1</sub>**

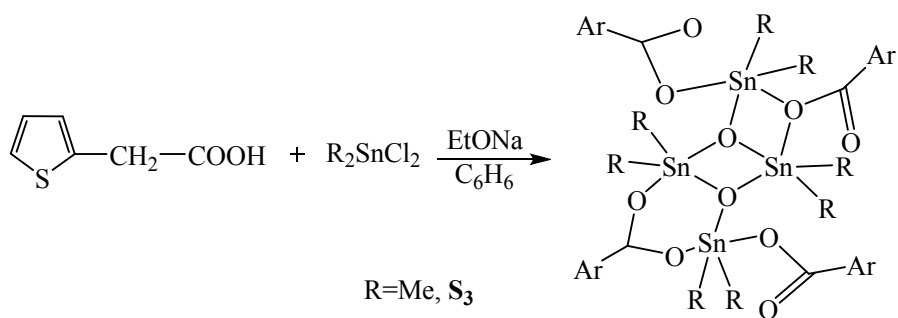

R=Me, **S<sub>3</sub>**

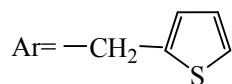

**Scheme S1** The syntheses procedures of complexes **S1**, **S3**

## Synthesis of complex **S1**, **S3**

$[\text{Me}_3\text{Sn}(\text{O}_2\text{CCH}_2\text{C}_4\text{H}_3\text{S}-o)]_n$  (**S1**): The reaction was carried out under nitrogen atmosphere by use of standard Schlenk techniques. The 2-thiopheneacetic acid (0.142 g, 1.0 mmol) was added to the solution of benzene (30 ml) together with sodium ethoxide (0.068 g, 1.0 mmol), and the mixture was stirred for 0.5 h. Then the trimethyltin chloride (0.199 g, 1.0 mmol) was added to the reactor, the mixture was stirred at 50 °C for 12 h and then filtered. The solvent was gradually removed by evaporation under reduced pressure until a white powder was obtained. The powder was then recrystallized from ether, and the colorless crystals were recovered. Yield: 60%. M.P. 130-133 °C. Anal. Calc. for  $\text{C}_9\text{H}_{14}\text{O}_2\text{SSn}$ : C 35.42, H 4.59%; Found: C 35.54, H 4.68%. IR (KBr,  $\text{cm}^{-1}$ ):  $\nu(\text{Sn-O})$ , 478;  $\nu(\text{O-Sn-O})$ , 631;  $\nu(\text{Sn-C})$ , 552;  $\nu(\text{COO})_{\text{as}}$ , 1569;  $\nu(\text{COO})_{\text{s}}$ , 1372; [ $\Delta\nu = \nu(\text{COO})_{\text{as}} - \nu(\text{COO})_{\text{s}}$ ], 197.  $^1\text{H}$  NMR ( $\text{CDCl}_3$ , ppm):  $\delta$  6.96-7.26 (m, 3H,  $-\text{C}_4\text{H}_3\text{S}$ ), 1.55 (s, 2H,  $-\text{CH}_2$ ), 0.50 (s,  $^2J_{\text{SnH}} = 70.1$  Hz, 9H, 3 $\text{CH}_3$ ).  $^{13}\text{C}$  NMR ( $\text{CDCl}_3$ , ppm):  $\delta$  119.87-132.28 ( $\text{C}_4\text{H}_3\text{S}$ ), 170.94 (COO), 31.46 ( $\text{CH}_2\text{-COO}$ ), -1.23 ( $^1J_{\text{SnC}} = 493$  Hz,  $\text{Sn-CH}_3$ ).  $^{119}\text{Sn}$  NMR ( $\text{CDCl}_3$ , ppm):  $\delta$  -142.4.

$(\text{Me}_2\text{Sn})_4(\mu_3\text{-O})_2(\text{O}_2\text{CCH}_2\text{C}_4\text{H}_3\text{S}-o)_4$  (**S3**): Complex **S3** was synthesized in a similar way to complex **S1**, by using 2-thiopheneacetic acid (0.142 g, 1.0 mmol), benzene (30 ml), sodium ethoxide (0.068 g, 1.0 mmol), dimethyltin dichloride (0.110 g, 0.5 mmol). The powder was recrystallized from ether, and the colorless crystals of complex **S3** were recovered. Yield: 58%. M.P. 135-138 °C. Anal. Calc. for  $\text{C}_{32}\text{H}_{44}\text{O}_{10}\text{S}_4\text{Sn}_4$ : C 32.22, H 3.69%; Found: C 32.09, H 3.85%. IR (KBr,  $\text{cm}^{-1}$ ):  $\nu(\text{Sn-O})$ , 476;  $\nu(\text{O-Sn-O})$ , 698;  $\nu(\text{Sn-C})$ , 545;  $\nu(\text{COO})_{\text{as}}$ , 1569;  $\nu(\text{COO})_{\text{s}}$ , 1382; [ $\Delta\nu = \nu(\text{COO})_{\text{as}} - \nu(\text{COO})_{\text{s}}$ ], 187.  $^1\text{H}$  NMR ( $\text{CDCl}_3$ , ppm):  $\delta$  6.97-7.26 (m, 12H, 4 $\text{C}_4\text{H}_3\text{S}$ ), 1.25 (s, 8H, 4 $\text{CH}_2$ ), 1.25 (s,  $^2J_{\text{SnH}} = 92.5$  Hz, 24H, 8 $\text{CH}_3$ ).  $^{13}\text{C}$  NMR ( $\text{CDCl}_3$ , ppm):  $\delta$  124.80-126.78 ( $\text{C}_4\text{H}_3\text{S}$ ), 171.23 (COO), 29.71 ( $\text{CH}_2\text{-COO}$ ), 4.38 ( $^1J_{\text{SnC}} = 824$  Hz,  $\text{Sn-CH}_3$ ).  $^{119}\text{Sn}$  NMR ( $\text{CDCl}_3$ , ppm):  $\delta$  -175.63, -182.44.

## 2. X-ray crystallography

**Table S1** Selected bond lengths [ $\text{\AA}$ ] and angles [ $^\circ$ ] for complex **1**.

| Complex <b>1</b>  |           |                   |           |
|-------------------|-----------|-------------------|-----------|
| Sn(1)-C(7)        | 2.133(8)  | Sn(1)-C(8)        | 2.114(9)  |
| Sn(1)-C(9)        | 2.118(8)  | Sn(1)-O(1)        | 2.408(6)  |
| Sn(1)-O(2)#1      | 2.191(6)  | Sn(2)-C(16)       | 2.120(10) |
| Sn(2)-C(17)       | 2.112(8)  | Sn(2)-C(18)       | 2.106(10) |
| Sn(2)-O(3)        | 2.384(6)  | Sn(2)-O(4)#2      | 2.174(6)  |
| O(1)-C(6)         | 1.248(9)  | O(2)-C(6)         | 1.273(10) |
| O(3)-C(15)        | 1.236(10) | O(4)-C(15)        | 1.266(10) |
| Se(1)-C(4)        | 1.852(13) | Se(1)-C(5)        | 1.947(10) |
| Se(2)-C(13)       | 1.894(12) | Se(2)-C(14)       | 1.943(10) |
| O(2)#1-Sn(1)-O(1) | 172.7(2)  | C(8)-Sn(1)-C(9)   | 121.6(4)  |
| C(8)-Sn(1)-C(7)   | 122.4(4)  | C(9)-Sn(1)-C(7)   | 115.3(4)  |
| O(4)#2-Sn(2)-O(3) | 170.7(2)  | C(17)-Sn(2)-C(18) | 120.9(4)  |
| C(17)-Sn(2)-C(16) | 119.4(4)  | C(18)-Sn(2)-C(16) | 119.2(4)  |

Symmetry code for complex **1**: #1  $-x+1, y-1/2, -z+1/2$  #2  $-x+2, y+1/2, -z+1/2$

**Table S2** Selected bond lengths [ $\text{\AA}$ ] and angles [ $^\circ$ ] for complex **2**.

| Complex <b>2</b>  |          |                  |            |
|-------------------|----------|------------------|------------|
| Sn(1)-O(1)        | 2.198(5) | Sn(1)-O(2)       | 2.388(5)   |
| Sn(1)-C(7)        | 2.136(6) | Sn(1)-C(13)      | 2.130(7)   |
| Sn(1)-C(19)       | 2.145(7) | Se(1)-C(4)       | 1.905(8)   |
| Se(1)-C(5)        | 1.973(7) | O(1)-Sn(1)-O(2)  | 176.16(16) |
| C(13)-Sn(1)-O(1)  | 95.0(2)  | C(7)-Sn(1)-C(19) | 119.4(3)   |
| C(13)-Sn(1)-C(19) | 111.3(3) | C(13)-Sn(1)-C(7) | 128.6(3)   |
| C(4)-Se(1)-C(5)   | 99.3(3)  | C(6)-C(5)-Se(1)  | 110.5(5)   |

Symmetry code for complex **2**: #1  $y+1, -x+y+1, -z+2$  #2  $x-y, x-1, -z+2$

**Table S3** Selected bond lengths [ $\text{\AA}$ ] and angles [ $^\circ$ ] for complex **3**.

| Complex <b>3</b>  |           |                   |           |
|-------------------|-----------|-------------------|-----------|
| Sn(1)-C(9)        | 2.140(13) | Sn(1)-C(10)       | 2.140(12) |
| Sn(1)-O(5)        | 2.090(6)  | Sn(1)-O(5)#1      | 2.163(6)  |
| Sn(1)-O(2)        | 2.364(7)  | Sn(2)-C(7)        | 2.149(11) |
| Sn(2)-C(8)        | 2.109(10) | Sn(2)-O(5)        | 2.077(6)  |
| Sn(2)-O(1)        | 2.326(7)  | Sn(2)-O(3)        | 2.276(8)  |
| Se(1)-C(4)        | 1.961(12) | Se(1)-C(5)        | 1.992(11) |
| Se(2)-C(12)       | 1.960(13) | Se(2)-C(13)       | 2.002(15) |
| C(9)-Sn(1)-C(10)  | 144.9(6)  | O(5)-Sn(1)-C(9)   | 104.8(4)  |
| O(5)-Sn(1)-O(2)   | 89.5(3)   | O(5)-Sn(1)-O(5)#1 | 77.5(3)   |
| O(5)#1-Sn(1)-O(2) | 166.2(3)  | C(8)-Sn(2)-C(7)   | 153.7(4)  |
| O(5)-Sn(2)-O(3)   | 77.6(3)   | O(5)-Sn(2)-C(8)   | 105.6(3)  |
| O(5)-Sn(2)-O(1)   | 93.1(3)   | O(3)-Sn(2)-O(1)   | 170.3(3)  |
| C(8)-Sn(2)-O(3)   | 93.7(3)   | C(4)-Se(1)-C(5)   | 97.9(5)   |

Symmetry code for complex **3**: #1 -x+1, -y+2, -z**Table S4** Selected bond lengths [ $\text{\AA}$ ] and angles [ $^\circ$ ] for complex **4**.

| Complex <b>4</b>  |          |                   |          |
|-------------------|----------|-------------------|----------|
| Sn(1)-O(1)        | 2.191(6) | Sn(1)-O(4)        | 2.169(6) |
| Sn(1)-O(14)       | 2.083(6) | Sn(1)-O(16)       | 2.074(6) |
| Sn(1)-O(18)       | 2.058(5) | Sn(2)-O(6)        | 2.143(6) |
| Sn(2)-O(8)        | 2.196(6) | Sn(2)-O(15)       | 2.100(6) |
| Sn(2)-O(16)       | 2.112(5) | Sn(2)-O(17)       | 2.082(5) |
| Sn(3)-O(10)       | 2.159(6) | Sn(3)-O(12)       | 2.165(6) |
| Sn(3)-O(13)       | 2.105(6) | Sn(3)-O(17)       | 2.085(6) |
| Sn(3)-O(18)       | 2.120(5) | O(18)-Sn(1)-O(16) | 104.3(2) |
| O(18)-Sn(1)-O(14) | 78.3(2)  | O(18)-Sn(1)-O(4)  | 162.0(2) |
| O(16)-Sn(1)-O(14) | 78.5(2)  | O(16)-Sn(1)-O(4)  | 85.3(2)  |
| O(14)-Sn(1)-O(4)  | 89.0(2)  | O(4)-Sn(1)-O(1)   | 76.9(2)  |

**Table S5** Crystallographic data and structure refinement parameters for complexes **S1**, **S3**

| Complex                                | <b>S1</b>                                           | <b>S3</b>                                                                      |
|----------------------------------------|-----------------------------------------------------|--------------------------------------------------------------------------------|
| Empirical formula                      | C <sub>9</sub> H <sub>14</sub> O <sub>2</sub> SSn   | C <sub>32</sub> H <sub>44</sub> O <sub>10</sub> S <sub>4</sub> Sn <sub>4</sub> |
| M                                      | 304.95                                              | 1191.67                                                                        |
| Crystal system                         | Monoclinic                                          | Triclinic                                                                      |
| space group                            | <i>P2(1)/c</i>                                      | <i>P-1</i>                                                                     |
| a [Å]                                  | 9.5306(8)                                           | 11.5630(9)                                                                     |
| b [Å]                                  | 10.1525(9)                                          | 13.9921(11)                                                                    |
| c [Å]                                  | 13.2324(13)                                         | 14.0809(12)                                                                    |
| α [°]                                  | 90                                                  | 102.954(2)                                                                     |
| β [°]                                  | 104.104(2)                                          | 99.9210(10)                                                                    |
| γ [°]                                  | 90                                                  | 95.8710(10)                                                                    |
| V [Å <sup>3</sup> ]                    | 1241.76(19)                                         | 2163.3(3)                                                                      |
| Z                                      | 4                                                   | 2                                                                              |
| D <sub>calc</sub> (Mg/m <sup>3</sup> ) | 1.631                                               | 1.829                                                                          |
| μ(mm <sup>-1</sup> )                   | 2.197                                               | 2.523                                                                          |
| F(000)                                 | 600                                                 | 1160                                                                           |
| Crystal size(mm)                       | 0.36 x 0.29 x 0.27                                  | 0.46 x 0.29 x 0.17                                                             |
| Reflections collected                  | 6078                                                | 10976                                                                          |
| Unique reflections                     | 2171                                                | 7479                                                                           |
| R(int)                                 | 0.0418                                              | 0.0401                                                                         |
| Goodness-of-fit on F <sup>2</sup>      | 1.022                                               | 1.032                                                                          |
| Final R indices [I>2σ(I)]              | R <sub>1</sub> = 0.0429<br>wR <sub>2</sub> = 0.1150 | R <sub>1</sub> = 0.0541<br>wR <sub>2</sub> = 0.1466                            |
| R indices (all data)                   | R <sub>1</sub> = 0.0562<br>wR <sub>2</sub> = 0.1247 | R <sub>1</sub> = 0.0732<br>wR <sub>2</sub> = 0.1614                            |

**Table S6** Selected bond lengths [Å] and angles [°] for complex **S1**

| Complex <b>S1</b> |          |                   |            |
|-------------------|----------|-------------------|------------|
| Sn(1)-O(1)        | 2.363(4) | Sn(1)-O(2)#1      | 2.202(4)   |
| Sn(1)-C(7)        | 2.105(7) | Sn(1)-C(8)        | 2.120(6)   |
| Sn(1)-C(9)        | 2.123(6) | O(1)-Sn(1)-O(2)#1 | 173.26(14) |
| C(7)-Sn(1)-O(1)   | 86.4(2)  | C(8)-Sn(1)-O(1)   | 90.0(2)    |
| C(9)-Sn(1)-O(1)   | 85.4(2)  | C(6)-O(1)-Sn(1)   | 137.6(4)   |
| C(8)-Sn(1)-C(7)   | 122.6(3) | C(7)-Sn(1)-C(9)   | 120.3(3)   |
| C(8)-Sn(1)-C(9)   | 116.5(3) |                   |            |

Symmetry code for complex **S1**: #1 -x+1, y-1/2, -z+1/2 #2 -x+1, y+1/2, -z+1/2

**Table S7** Selected bond lengths [Å] and angles [°] for complex **S3**

| Complex <b>S3</b> |          |                   |          |
|-------------------|----------|-------------------|----------|
| Sn(1)-O(2)        | 2.200(6) | Sn(1)-O(3)        | 2.277(6) |
| Sn(1)-O(5)        | 2.042(5) | Sn(2)-O(4)        | 2.248(6) |
| Sn(2)-O(5)        | 2.028(5) | Sn(2)-O(6)        | 2.107(6) |
| Sn(3)-O(5)        | 2.181(5) | Sn(3)-O(6)        | 2.056(6) |
| Sn(3)-O(8)        | 2.280(6) | Sn(4)-O(6)        | 2.026(5) |
| Sn(4)-O(8)        | 2.467(7) | Sn(4)-O(9)        | 2.137(6) |
| O(5)-Sn(1)-O(2)   | 79.2(2)  | O(5)-Sn(1)-O(3)   | 89.5(2)  |
| O(2)-Sn(1)-O(3)   | 168.1(2) | C(25)-Sn(1)-C(26) | 149.3(4) |
| O(5)-Sn(2)-O(6)   | 75.8(2)  | O(5)-Sn(2)-O(4)   | 87.5(2)  |
| O(6)-Sn(2)-O(4)   | 162.4(2) | C(29)-Sn(2)-C(30) | 131.6(4) |
| O(6)-Sn(3)-O(5)   | 73.6(2)  | O(6)-Sn(3)-O(8)   | 72.1(2)  |
| O(5)-Sn(3)-O(8)   | 145.7(2) | C(27)-Sn(3)-C(28) | 141.5(4) |
| O(6)-Sn(4)-O(8)   | 68.6(2)  | O(9)-Sn(4)-O(8)   | 149.6(2) |
| O(6)-Sn(4)-O(9)   | 81.2(2)  | C(32)-Sn(4)-C(31) | 139.5(4) |



### 3. Figures of crystal structure

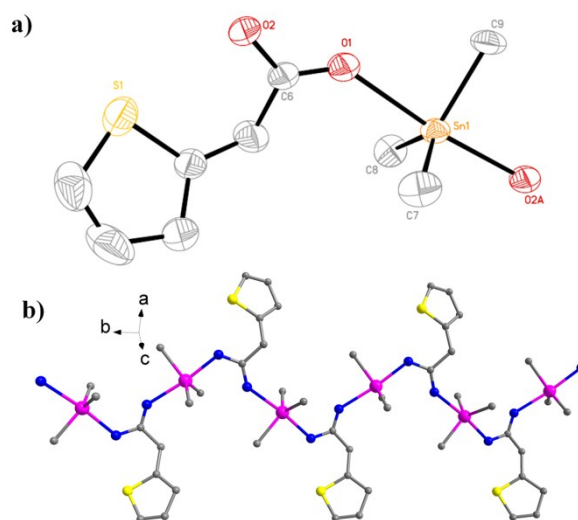

**Figure S1** The asymmetry unit (a) and 1D infinite zig-zag chain structure (b) of complex **S1**. Hydrogen atoms are omitted for clarity.

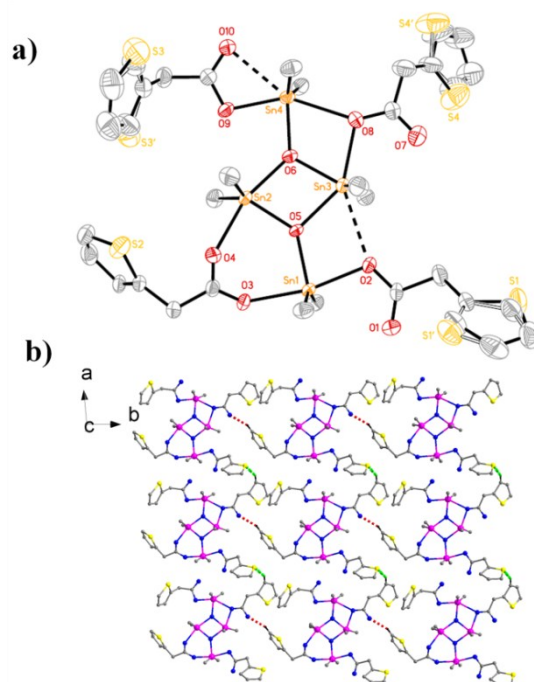

**Figure S2** Molecular structure (a) and 1D infinite chain structure connected by C-H $\cdots$ O and C-H $\cdots$ S hydrogen bonding interactions (b) of complex **S3**. Hydrogen atoms are omitted for clarity.
